# Supplementary material for: Weight Change after Striatal/Capsule Deep Brain Stimulation Relates to Connectivity to the Bed Nucleus of the Stria Terminalis and Hypothalamus
Source: MDPI journal article supplement (doi:10.3390/brainsci9100264), 2019-10-03
Supplement: s1 [file s1]

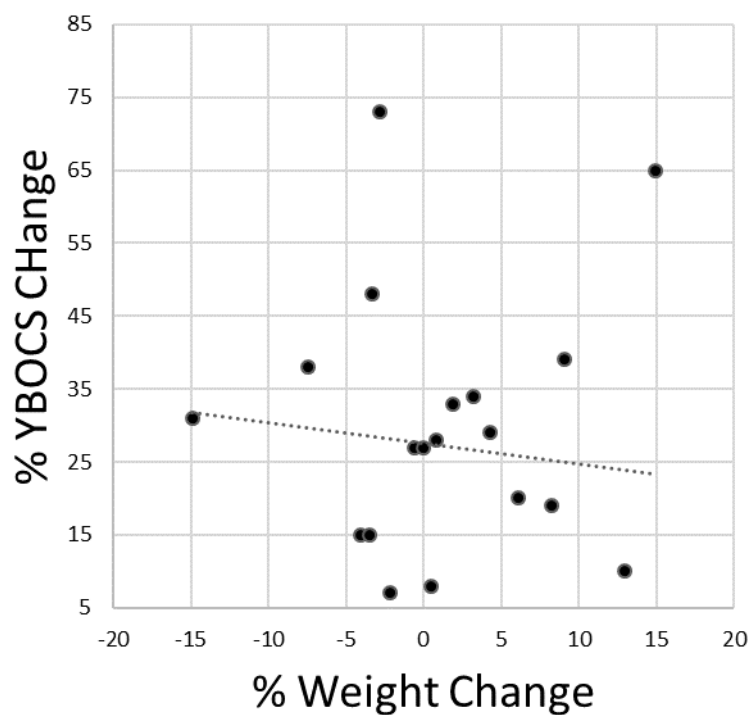

**Figure S1.** Scatter plot of weight changes after deep brain stimulation and changes in symptoms of obsessive-compulsive disorders assessed using the Yale-Brown Obsessive Compulsive Scale (Y-BOCS).
